# Supplementary figures and images for: Gel rupture during dynamic swelling
Source: Royal Society of Chemistry journal article supplement (doi:10.1039/d0sm01718c), 2020-12-14

**(a)**

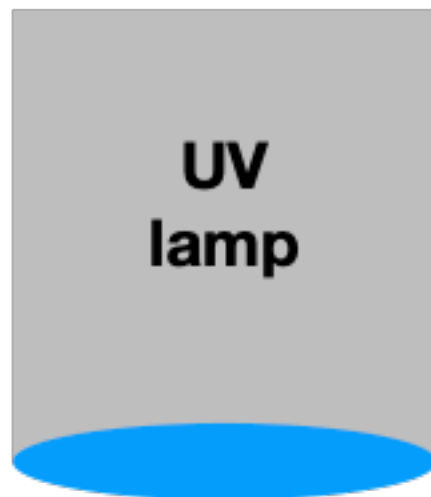

**(b)**

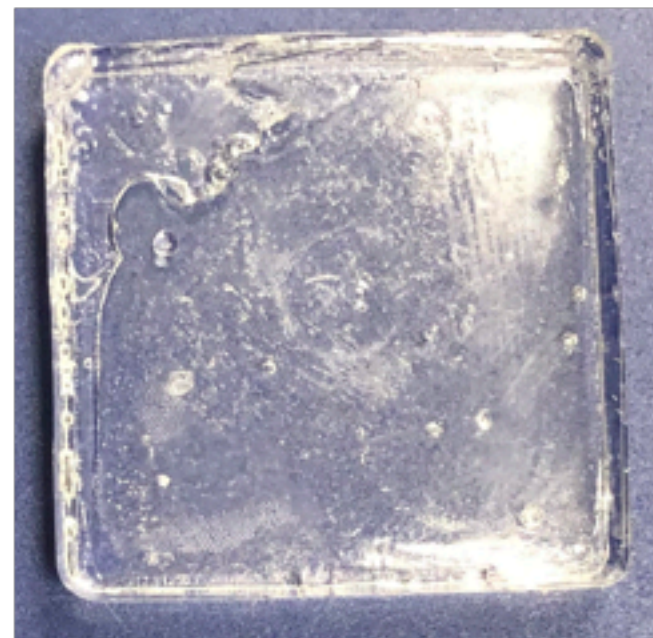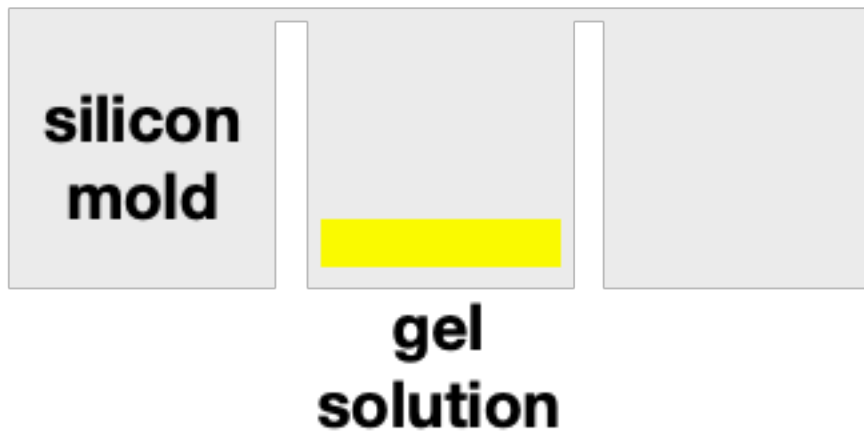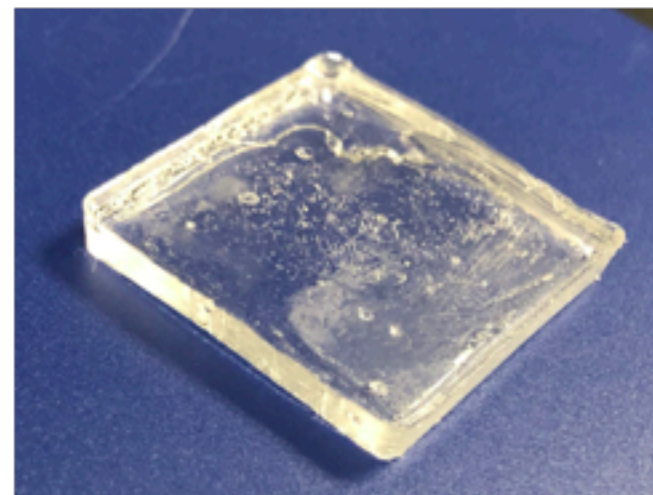

Supplement: d0sm01718c1.pdf [file d0sm01718c1.pdf]
